# Supplementary material for: Novel method for quantification of lipoprotein(a)-cholesterol: implications for improving accuracy of LDL-C measurements
Source: PubMed Central journal article supplement — J Lipid Res. 2021 Feb 24;62:100053. doi: 10.1016/j.jlr.2021.100053 (PMC8042377; doi:10.1016/j.jlr.2021.100053), 2021-02-24

## **Data Supplement**

### **Supplemental Methods**

#### *Apolipoprotein quantification in fractions eluted from gel filtration column for Lp(a) purification*

Five microliters from each 0.5 mL fraction eluted from gel filtration column was diluted into 395 microliters of PBS in a 96 well plate. Fifty microliters of each diluted fraction were then coated onto ELISA plates overnight at 4C. Each plate was then washed, blocked with 1% BSA in PBS, then 1 ug/ml of following antibodies against the desired apolipoproteins were added to their respective plate: biotin-LPA4 for apo(a), biotin-goat anti-human apolipoprotein B-100 (Academy BioMed), and biotin-goat anti-human apolipoprotein AI (Academy BioMed). After unbound antibodies were washed off, apolipoproteins were quantified by neutral-avidin conjugated alkaline phosphatase and Lumiphos (Lumigen) generated relative light units (RLUs) as read on a BioTek plate reader.

Total protein from each fraction was quantified by Bradford protein assay (Pierce) using the manufacturer's protocol.

#### *Lipoprotein electrophoresis*

Plasma or purified lipoproteins were resolved on an agarose gel and stained for lipids as per the manufacturer's protocol (Helena Laboratories).

## **Supplemental Figure Legends**

**Supplemental Figure 1.** Quantification of apolipoprotein(a) [apo(a)], apolipoprotein B-100 (apoB100), apolipoprotein AI (apoAI) by ELISA, and total protein in each fraction eluted from the SW-400 gel filtration column as part of the Lp(a) purification process. Relative light units (RLUs) associated with the apoAI ELISA are expressed on a secondary (right) axis due to much lower values compared to apo(a) and apoB100. The fractions delineated by black lines correspond to those pooled for pure Lp(a).

**Supplemental Figure 2.** Purity of Lp(a) preparation. Agarose gel electrophoresis and lipid staining of plasma, purified LDL, purified HDL and purified Lp(a) from the same donor.

Supplemental Table 1. Patient demographics and lipid parameters in individuals with elevated baseline Lp(a) enrolled in a Lp(a) lowering ASO clinical trial.

| Subject ID | Treatment group | Timepoint | Gender | Race  | TC (mg/dL) | "LDL-C" (mg/dL) | HDL-C (mg/dL) | TG (mg/dL) | Lp(a) NWRL (nM) | Lp(a) UCSD (mg/dL) | Lp(a)-C (mg/dL) | correct LDL-C (mg/dL) |
|------------|-----------------|-----------|--------|-------|------------|-----------------|---------------|------------|-----------------|--------------------|-----------------|-----------------------|
| 1          | Ionis apo(a)rx  | Baseline  | F      | White | 236        | 153             | 53            | 149        | 334.2           | 103.2              | 12.7            | 140.3                 |
| 1          | Ionis apo(a)rx  | Recovery  | F      | White | 230        | 142             | 57            | 153        | 248.4           | 71.6               | 11.5            | 130.5                 |
| 1          | Ionis apo(a)rx  | Trough    | F      | White | 315        | 222             | 48            | 227        | 80.3            | 31.6               | 7.1             | 214.9                 |
| 2          | Placebo         | Baseline  | F      | White | 187        | 117             | 55            | 77         | 168.1           | 62.5               | 8.4             | 108.6                 |
| 2          | Placebo         | Recovery  | F      | White | 183        | 110             | 56            | 87         | 178.3           | 73.9               | 8.8             | 101.2                 |
| 2          | Placebo         | Trough    | F      | White | 167        | 99              | 55            | 63         | 174.2           | 57.1               | 8.5             | 90.5                  |
| 3          | Ionis apo(a)rx  | Baseline  | M      | White | 162        | 103             | 36            | 114        | 200.0           | 81.5               | 5.6             | 97.4                  |
| 3          | Ionis apo(a)rx  | Recovery  | M      | White | 184        | 122             | 31            | 155        | 189.7           | 60.1               | 6.3             | 115.7                 |
| 3          | Ionis apo(a)rx  | Trough    | M      | White | 155        | 91              | 29            | 176        | 117.9           | 55.4               | 5.3             | 85.7                  |
| 4          | Ionis apo(a)rx  | Baseline  | M      | White | 145        | 77              | 55            | 64         | 234.0           | 78.4               | 7.7             | 69.3                  |
| 4          | Ionis apo(a)rx  | Recovery  | M      | White | 166        | 83              | 58            | 125        | 183.6           | 65.2               | 5.5             | 77.5                  |
| 4          | Ionis apo(a)rx  | Trough    | M      | White | 143        | 72              | 58            | 65         | 50.6            | 37.9               | 2.2             | 69.8                  |
| 5          | Ionis apo(a)rx  | Baseline  | F      | White | 157        | 74              | 49            | 171        |                 | 55.3               | 13.0            | 61.0                  |
| 5          | Ionis apo(a)rx  | Recovery  | F      | White | 164        | 84              | 51            | 146        | 193.1           | 81.3               | 12.9            | 71.1                  |
| 5          | Ionis apo(a)rx  | Trough    | F      | White | 151        | 75              | 47            | 145        | 26.5            | 5.3                | 2.4             | 72.6                  |
| 6          | Ionis apo(a)rx  | Baseline  | F      | White | 179        | 103             | 50            | 130        | 387.2           | 157.8              | 24.6            | 78.4                  |
| 6          | Ionis apo(a)rx  | Trough    | F      | White | 162        | 78              | 61            | 116        | 75.5            | 24.5               | 5.0             | 73.0                  |
| 7          | Ionis apo(a)rx  | Baseline  | M      | White | 217        | 155             | 47            | 76         | 374.8           | 123.1              | 14.2            | 140.8                 |
| 7          | Ionis apo(a)rx  | Recovery  | M      | White | 240        | 173             | 44            | 116        | 439.9           | 98.2               | 18.0            | 155.0                 |
| 7          | Ionis apo(a)rx  | Trough    | M      | White | 207        | 144             | 41            | 108        | 243.6           | 81.1               | 11.7            | 132.3                 |
| 8          | Ionis apo(a)rx  | Baseline  | M      | White | 214        | 147             | 35            | 160        | 175.3           | 72.7               | 8.7             | 138.3                 |
| 8          | Ionis apo(a)rx  | Recovery  | M      | White | 197        | 137             | 30            | 151        | 227.6           | 72.3               | 9.0             | 128.0                 |
| 8          | Ionis apo(a)rx  | Trough    | M      | White | 189        | 137             | 31            | 103        | 121.5           | 54.1               | 5.7             | 131.3                 |
| 9          | Ionis apo(a)rx  | Baseline  | M      | White | 204        | 127             | 58            | 93         | 338.5           | 114.8              | 12.6            | 114.4                 |
| 9          | Ionis apo(a)rx  | Recovery  | M      | White | 198        | 106             | 69            | 115        | 209.9           | 101.2              | 12.8            | 93.2                  |
| 9          | Ionis apo(a)rx  | Trough    | M      | White | 211        | 113             | 69            | 145        | 112.1           | 44.4               | 9.2             | 103.8                 |
| 10         | Placebo         | Baseline  | M      | White | 146        | 97              | 29            | 101        | 223.6           | 94.2               | 9.0             | 88.0                  |
| 10         | Placebo         | Trough    | M      | White | 130        | 76              | 30            | 118        | 189.1           | 99.3               | 10.9            | 65.1                  |
| 11         | Ionis apo(a)rx  | Baseline  | F      | Other | 250        | 134             | 52            | 319        | 350.7           | 111.4              | 18.7            | 115.4                 |
| 11         | Ionis apo(a)rx  | Recovery  | F      | Other | 248        | 134             | 60            | 271        | 326.6           | 95.7               | 15.3            | 118.7                 |
| 11         | Ionis apo(a)rx  | Trough    | F      | Other | 244        | 125             | 58            | 305        | 115.2           | 55.1               | 9.9             | 115.1                 |

|    |                |          |   |       |     |     |     |     |       |       |      |       |
|----|----------------|----------|---|-------|-----|-----|-----|-----|-------|-------|------|-------|
| 12 | Ionis apo(a)rx | Baseline | M | White | 299 | 196 | 58  | 226 | 322.3 | 80.3  | 33.4 | 162.6 |
| 12 | Ionis apo(a)rx | Recovery | M | White | 263 | 186 | 54  | 117 | 240.5 | 54.4  | 17.1 | 169.0 |
| 12 | Ionis apo(a)rx | Trough   | M | White | 212 | 134 | 49  | 143 | 45.2  | 12.9  | 5.6  | 128.5 |
| 13 | Ionis apo(a)rx | Baseline | F | White | 213 | 163 | 34  | 81  | 525.8 | 138.6 | 24.4 | 138.6 |
| 13 | Ionis apo(a)rx | Recovery | F | White | 211 | 147 | 38  | 128 | 329.5 | 109.4 | 23.8 | 123.2 |
| 13 | Ionis apo(a)rx | Trough   | F | White | 202 | 139 | 43  | 101 | 33.7  | 19.2  | 5.2  | 133.8 |
| 14 | Ionis apo(a)rx | Baseline | M | White | 130 | 66  | 43  | 105 | 456.1 | 134.4 | 28.0 | 38.0  |
| 14 | Ionis apo(a)rx | Recovery | M | White | 138 | 66  | 42  | 149 | 363.2 | 114.1 | 18.5 | 47.5  |
| 14 | Ionis apo(a)rx | Trough   | M | White | 102 | 42  | 36  | 120 | 147.3 | 60.6  | 8.0  | 34.0  |
| 15 | Ionis apo(a)rx | Baseline | F | White | 209 | 130 | 61  | 89  | 469.8 | 127.3 | 25.3 | 104.7 |
| 15 | Ionis apo(a)rx | Recovery | F | White | 206 | 128 | 62  | 80  | 407.7 | 98.0  | 22.7 | 105.3 |
| 15 | Ionis apo(a)rx | Trough   | F | White | 194 | 122 | 53  | 97  | 167.0 | 67.0  | 17.2 | 104.8 |
| 16 | Ionis apo(a)rx | Baseline | F | White | 204 | 115 | 59  | 148 | 497.8 | 129.7 | 19.8 | 95.2  |
| 16 | Ionis apo(a)rx | Trough   | F | White | 149 | 75  | 46  | 142 | 158.1 | 56.3  | 5.0  | 70.0  |
| 17 | Ionis apo(a)rx | Baseline | F | White | 176 | 99  | 54  | 114 | 396.5 | 155.8 | 24.2 | 74.8  |
| 17 | Ionis apo(a)rx | Recovery | F | White | 187 | 110 | 53  | 120 | 392.3 | 132.9 | 20.8 | 89.2  |
| 17 | Ionis apo(a)rx | Trough   | F | White | 138 | 65  | 57  | 80  | 98.6  | 55.9  | 9.5  | 55.5  |
| 18 | Ionis apo(a)rx | Baseline | M | White | 198 | 85  | 91  | 108 | 239.3 | 78.0  | 9.6  | 75.4  |
| 18 | Ionis apo(a)rx | Recovery | M | White | 189 | 78  | 99  | 61  | 201.3 | 76.9  | 11.6 | 66.4  |
| 18 | Ionis apo(a)rx | Trough   | M | White | 200 | 95  | 90  | 74  | 146.9 | 55.4  | 7.7  | 87.3  |
| 19 | Placebo        | Baseline | M | White | 247 | 173 | 49  | 123 | 228.9 | 77.2  | 17.1 | 155.9 |
| 19 | Placebo        | Recovery | M | White | 215 | 147 | 47  | 104 | 248.8 | 65.7  | 15.5 | 131.5 |
| 19 | Placebo        | Trough   | M | White |     |     |     |     | 243.8 | 91.6  | 17.9 |       |
| 20 | Ionis apo(a)rx | Baseline | F | White | 192 | 101 | 73  | 91  | 149.3 | 62.2  | 11.3 | 89.8  |
| 20 | Ionis apo(a)rx | Recovery | F | White | 179 | 88  | 64  | 135 | 67.2  | 27.3  | 8.3  | 79.7  |
| 20 | Ionis apo(a)rx | Trough   | F | White | 188 | 94  | 71  | 114 | 9.0   | 2.8   | 0.6  | 93.4  |
| 21 | Placebo        | Baseline | M | White | 218 | 125 | 40  | 264 | 161.8 | 65.4  | 26.5 | 98.5  |
| 21 | Placebo        | Recovery | M | White | 260 | 123 | 36  | 436 | 182.5 | 53.8  | 30.8 | 92.2  |
| 21 | Placebo        | Trough   | M | White | 270 | 139 | 38  | 411 | 131.9 | 57.6  | 21.8 | 117.2 |
| 22 | Placebo        | Baseline | F | White | 259 | 106 | 124 | 146 | 542.4 | 150.4 | 26.2 | 79.8  |
| 22 | Placebo        | Recovery | F | White | 264 | 123 | 122 | 95  | 465.6 | 133.6 | 27.9 | 95.1  |
| 22 | Placebo        | Trough   | F | White | 238 | 100 | 120 | 88  | 527.0 | 166.8 | 22.4 | 77.6  |
| 23 | Ionis apo(a)rx | Baseline | M | White | 149 | 62  | 59  | 138 | 156.5 | 67.2  | 13.2 | 48.8  |
| 23 | Ionis apo(a)rx | Recovery | M | White | 157 | 63  | 55  | 196 | 145.0 | 58.8  | 11.0 | 52.0  |

|    |                |          |   |       |     |     |    |     |       |       |      |       |
|----|----------------|----------|---|-------|-----|-----|----|-----|-------|-------|------|-------|
| 23 | Ionis apo(a)rx | Trough   | M | White | 141 | 52  | 53 | 178 | 79.5  | 38.9  | 9.6  | 42.4  |
| 24 | Ionis apo(a)rx | Baseline | F | White | 202 | 125 | 52 | 123 | 822.8 | 115.8 | 35.0 | 90.0  |
| 24 | Ionis apo(a)rx | Recovery | F | White | 178 | 118 | 44 | 78  | 697.0 | 102.7 | 25.7 | 92.3  |
| 24 | Ionis apo(a)rx | Trough   | F | White | 181 | 107 | 44 | 148 | 505.8 | 101.0 | 19.7 | 87.3  |
| 25 | Ionis apo(a)rx | Baseline | M | White | 235 | 155 | 63 | 85  | 176.6 | 69.2  | 10.2 | 144.8 |
| 25 | Ionis apo(a)rx | Recovery | M | White | 212 | 136 | 61 | 76  | 166.1 | 53.4  | 8.2  | 127.8 |
| 25 | Ionis apo(a)rx | Trough   | M | White | 188 | 117 | 57 | 68  | 90.3  | 27.5  | 5.9  | 111.1 |
| 26 | Placebo        | Baseline | M | White | 212 | 151 | 49 | 60  | 270.0 | 98.4  | 15.9 | 135.1 |
| 26 | Placebo        | Recovery | M | White | 200 | 128 | 60 | 61  | 220.2 | 79.3  | 14.4 | 113.6 |
| 26 | Placebo        | Trough   | M | White | 208 | 138 | 52 | 88  | 240.1 | 91.7  | 15.8 | 122.2 |
| 27 | Placebo        | Baseline | M | White | 155 | 100 | 42 | 66  | 204.9 | 73.2  | 13.2 | 86.8  |
| 27 | Placebo        | Recovery | M | White | 135 | 82  | 44 | 46  | 190.0 | 73.2  | 10.8 | 71.2  |
| 27 | Placebo        | Trough   | M | White | 150 | 99  | 39 | 61  | 239.2 | 78.0  | 9.7  | 89.3  |
| 28 | Placebo        | Baseline | F | White | 248 | 151 | 67 | 148 | 209.0 | 70.3  | 12.6 | 138.4 |
| 28 | Placebo        | Recovery | F | White | 277 | 180 | 64 | 166 | 165.1 | 52.1  | 14.6 | 165.4 |
| 28 | Placebo        | Trough   | F | White |     |     |    |     | 170.4 | 54.2  | 16.4 |       |
| 29 | Ionis apo(a)rx | Baseline | F | White | 166 | 72  | 61 | 164 | 522.4 | 123.8 | 21.5 | 50.5  |
| 29 | Ionis apo(a)rx | Recovery | F | White | 238 | 143 | 58 | 186 | 490.3 | 92.8  | 22.5 | 120.5 |
| 29 | Ionis apo(a)rx | Trough   | F | White | 135 | 47  | 51 | 186 | 218.8 | 84.6  | 11.8 | 35.2  |

Supplemental Table 2. Spearman correlation coefficients (p-values) between Lp(a)-C and various Lp(a) and plasma lipoprotein parameters in individuals with elevated baseline Lp(a) enrolled in a Lp(a) lowering ASO clinical trial.

|                               | Placebo ASO (n = 8)        |                            |                            | apo(a) <sub>rx</sub> ASO (n = 21) |                            |                 |
|-------------------------------|----------------------------|----------------------------|----------------------------|-----------------------------------|----------------------------|-----------------|
|                               | Lp(a) molar (nM)           | Lp(a)-C (mg/dL)            | % Lp(a)-C                  | Lp(a) molar (nM)                  | Lp(a)-C (mg/dL)            | % Lp(a)-C       |
| Total cholesterol (mg/dL)     | 0.04 (p = 0.9)             | <b>0.74 (p &lt; 0.001)</b> | <b>0.75 (p &lt; 0.001)</b> | 0.2 (p = 0.08)                    | 0.25 (p = 0.52)            | 0.18 (p = 0.16) |
| "LDL-C" (mg/dL)               | -0.02 (p = 0.95)           | 0.4 (p = 0.058)            | <b>0.68 (p = 0.001)</b>    | <b>0.28 (p = 0.03)</b>            | 0.23 (p = 0.08)            | 0.13 (p = 0.3)  |
| LDL-C <sub>corr</sub> (mg/dL) | -0.12 (p = 0.6)            | 0.12 (p = 0.6)             | <b>0.50 (p = 0.02)</b>     | 0.12 (p = 0.4)                    | 0.06 (p = 0.6)             | 0.89 (p = 0.5)  |
| HDL-C (mg/dL)                 | 0.36 (p = 0.1)             | 0.13 (p = 0.6)             | 0.04 (p = 0.9)             | -0.12 (p = 0.4)                   | 0.009 (p = .95)            | 0.12 (p = 0.4)  |
| TG (mg/dL)                    | -0.27 (p = 0.24)           | <b>0.54 (p = 0.01)</b>     | <b>0.58 (p = 0.006)</b>    | 0.01 (p = 0.9)                    | 0.08 (p = 0.5)             | 0.15 (p = 0.2)  |
| Lp(a) mass (mg/dL)            | <b>0.8 (p &lt; 0.001)</b>  | 0.14 (p = 0.5)             | <b>-0.54 (p = 0.009)</b>   | <b>0.92 (p &lt; 0.001)</b>        | <b>0.82 (p &lt; 0.001)</b> | -0.2 (p = 0.1)  |
| Lp(a) molar (nM)              | 1                          | 0.27 (p = 0.2)             | -0.26 (p = 0.2)            | 1                                 | <b>0.86 (p &lt; 0.001)</b> | -0.04 (p = 0.7) |
| apo(a) major isoform size     | -0.3 (p = 0.18)            | <b>-0.46 (p = 0.03)</b>    | <b>-0.42 (p = 0.049)</b>   | na                                | na                         | na              |
| apo(a) minor isoform size     | -0.2 (p = 0.37)            | 0.26 (p = 0.2)             | 0.3 (p = 0.2)              | na                                | na                         | na              |
| OxPL-apoB (nM)                | <b>0.69 (p &lt; 0.001)</b> | 0.2 (p = 0.4)              | <b>-0.37 (p = 0.095)</b>   | <b>0.95 (p &lt; 0.001)</b>        | <b>0.76 (p &lt; 0.001)</b> | -0.15 (p = 0.3) |
| Lp(a)-C (mg/dL)               | 0.27 (p = 0.2)             | 1                          | <b>0.69 (p &lt; 0.001)</b> | <b>0.86 (p &lt; 0.001)</b>        | 1                          | 0.3 (p = 0.17)  |
| % Lp(a)-C                     | -0.26 (p = 0.2)            | <b>0.69 (p &lt; 0.001)</b> | 1                          | -0.04 (p = 0.7)                   | 0.3 (p = 0.17)             | 1               |

Data from all three timepoints (Baseline, Trough, and Recovery) included. OxPL-apoB = oxidized phospholipid on apolipoprotein B-100; TC = total cholesterol; LDL-C = low density lipoprotein cholesterol; HDL-C = high density lipoprotein cholesterol; TG = triglycerides; %Lp(a)-C = percent Lp(a)-C / Lp(a) mass. The natural relationship between apo(a) isoform size and Lp(a) levels is preserved only in the placebo group, and therefore correlations with apo(a) isoform size were only reported for this group. Statistically significant correlations in bold.

Supplemental Table 3. Spearman correlation coefficients (p-values) between Lp(a)-C and various Lp(a) and plasma lipoprotein parameters in baseline samples.

|                               | <b>Baseline samples (n = 29)</b> |                            |                            |
|-------------------------------|----------------------------------|----------------------------|----------------------------|
|                               | Lp(a) molar (nM)                 | Lp(a)-C (mg/dL)            | % Lp(a)-C                  |
| Total cholesterol (mg/dL)     | 0.12 (p = 0.6)                   | 0.29 (p = 0.12)            | 0.39 (p = 0.05)            |
| "LDL-C" (mg/dL)               | 0.05 (p = 0.79)                  | 0.17 (p = 0.37)            | 0.25 (p = 0.19)            |
| LDL-C <sub>corr</sub> (mg/dL) | -0.13 (p = 0.53)                 | -0.06 (p = 0.74)           | 0.09 (p = 0.65)            |
| HDL-C (mg/dL)                 | 0.07 (p = 0.72)                  | 0.11 (p = 0.59)            | -0.01 (p = 0.97)           |
| TG (mg/dL)                    | 0.09 (p = 0.66)                  | 0.33 (p = 0.07)            | <b>0.52 (p = 0.004)</b>    |
| Lp(a) mass (mg/dL)            | <b>0.92 (p &lt; 0.001)</b>       | <b>0.57 (p = 0.001)</b>    | -0.15 (p = 0.45)           |
| Lp(a) molar (nM)              | 1                                | <b>0.65 (p &lt; 0.001)</b> | 0.18 (p = 0.35)            |
| apo(a) major isoform size     | <b>-0.38 (p = 0.046)</b>         | <b>-0.39 (p = 0.04)</b>    | -0.23 (p = 0.24)           |
| apo(a) minor isoform size     | -0.29 (p = 0.14)                 | -0.07 (p = 0.74)           | -0.04 (p = 0.86)           |
| OxPL-apoB (nM)                | <b>0.90 (p &lt; 0.001)</b>       | <b>0.58 (p = 0.002)</b>    | -0.02 (p = 0.93)           |
| Lp(a)-C (mg/dL)               | <b>0.65 (p &lt; 0.001)</b>       | 1                          | <b>0.71 (p &lt; 0.001)</b> |
| % Lp(a)-C                     | 0.12 (p = 0.56)                  | <b>0.71 (p &lt; 0.001)</b> | 1                          |

OxPL-apoB = oxidized phospholipid on apolipoprotein B-100; TC = total cholesterol; LDL-C = low density lipoprotein cholesterol; HDL-C = high density lipoprotein cholesterol; TG = triglycerides; %Lp(a)-C = percent Lp(a)-C / Lp(a) mass. The natural relationship between apo(a) isoform size and Lp(a) levels is preserved only in the placebo group, and therefore correlations with apo(a) isoform size were only reported for this group. Statistically significant correlations in bold.

Supplemental Figure 1.

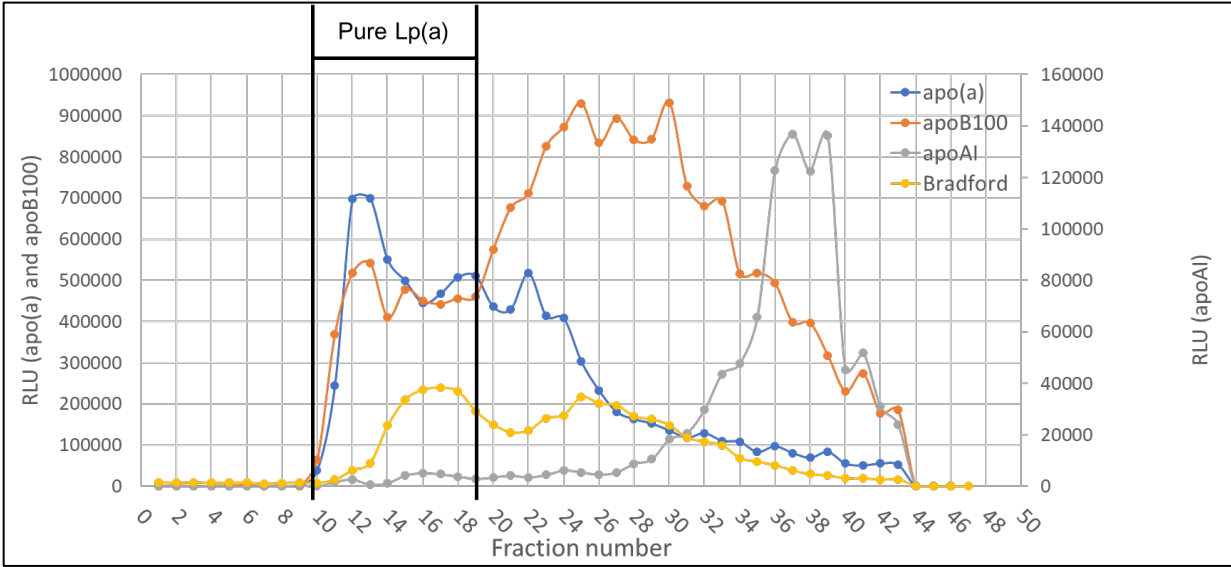



Supplemental Figure 2.

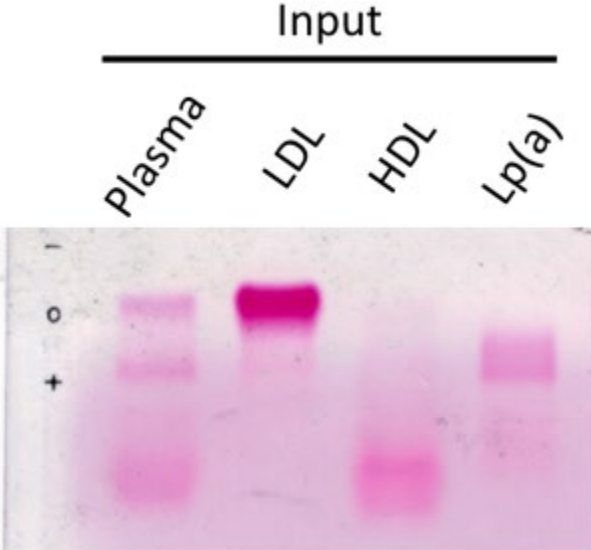

Supplement: mmc1.pdf [file mmc1.pdf]
